# Supplementary material for: Patterns of Polymorphism and Demographic History in Natural Populations of Arabidopsis lyrata
Source: PubMed Central journal article supplement (PMC2408968; doi:10.1371/journal.pone.0002411), 2008-06-11
Supplement: pone.0002411.s002.pdf [file pone.0002411.s002.pdf]

Table S1.

| locus     | Silent Sites | GER | CAN | USA | RUS | SWE | ICE | GO Terms                                           |
|-----------|--------------|-----|-----|-----|-----|-----|-----|----------------------------------------------------|
| AT1G72390 | 74           | 20  | 20  | 22  | 26  | 16  | 20  | expressed protein                                  |
| AT2G26140 | 95           | 22  | 18  | 8   | 30  | 10  | 12  | FtsH protease, putative                            |
| AT3G44530 | 118          | 18  | 18  | 18  | 28  | 16  | 18  | transducin family protein / WD-40 repeat family    |
| AT4G16280 | 271          | 10  | 10  | 10  | 10  | 10  | 14  | flowering time control protein / FCA gamma         |
| AT4G25540 | 357          | 10  | 10  | 10  | 10  | 10  | 14  | DNA mismatch repair protein MSH3 (MSH3)            |
| AT4G38630 | 269          | 10  | 10  | 10  | 10  | 10  | 14  | 26S proteasome regulatory subunit S5A (RPN10)      |
| AT2G44990 | 100          | 12  | 4   | 8   | 30  | 16  | 14  | armadillo/beta-catenin repeat family protein       |
| AT1G11050 | 108          | 22  | 22  | 20  | 24  | 14  | 18  | protein kinase family protein                      |
| AT1G04650 | 105          | 18  | 16  | 12  | 28  | 18  | 20  | hypothetical protein                               |
| AT1G06530 | 81           | 22  | 24  | 10  |     |     | 22  | myosin heavy chain-related                         |
| AT4G36060 | 247          | 10  | 10  | 10  | 10  | 10  | 14  | basic helix-loop-helix (bHLH) family protein       |
| AT4G38160 | 87           | 24  | 24  | 20  | 30  | 18  | 22  | mitochondrial transcription termination            |
| AT3G13290 | 110          | 14  | 14  | 16  | 30  | 18  | 8   | transducin family protein / WD-40 repeat family    |
| AT3G51570 | 79           | 12  | 18  | 10  | 22  | 18  | 18  | disease resistance protein (TIR-NBS-LRR class)     |
| AT4G20410 | 495          | 10  | 10  | 10  | 10  | 10  | 14  | gamma-soluble NSF attachment protein               |
| AT2G41360 | 99           | 22  | 20  | 14  |     |     | 16  | F-box family protein                               |
| AT3G23590 | 130          | 24  | 22  | 18  | 26  | 18  | 22  | expressed protein                                  |
| AT4G14180 | 107          | 24  | 24  | 20  | 26  | 16  | 22  | expressed protein                                  |
| AT4G18040 | 329          | 10  | 10  | 10  | 10  | 10  | 14  | eukaryotic translation initiation factor 4E 1      |
| AT2G26730 | 81           | 18  | 14  | 12  |     |     | 14  | leucine-rich repeat transmembrane protein          |
| AT2G47430 | 78           | 20  | 18  | 20  |     |     | 14  | cytokinin-responsive histidine kinase (CKI1)       |
| AT4G18520 | 93           | 16  | 22  | 18  | 6   | 4   | 18  | expressed protein                                  |
| AT5G04190 | 109          | 22  | 22  | 22  | 28  | 8   | 8   | phytochrome kinase substrate-related               |
| AT1G23200 | 98           | 12  | 22  | 10  | 26  | 12  | 6   | pectinesterase family protein                      |
| AT4G40080 | 223          | 10  | 10  | 10  | 10  | 10  | 14  | epsin N-terminal homology (ENTH)                   |
| AT5G20280 | 112          | 22  | 22  | 18  | 24  | 12  | 22  | sucrose-phosphate synthase, putative               |
| AT2G25050 | 99           | 24  | 22  | 20  | 28  | 14  | 14  | formin homology 2 domain-containing protein        |
| AT4G33250 | 530          | 10  | 10  | 10  | 10  | 10  | 14  | eukaryotic translation initiation factor 3         |
| AT4G28395 | 380          | 10  | 10  | 10  | 10  | 10  | 14  | lipid transfer protein, putative                   |
| AT1G06520 | 98           | 12  | 20  | 18  | 28  | 12  | 16  | phospholipid/glycerol acyltransferase family       |
| AT3G55060 | 90           | 22  | 24  | 14  | 30  | 16  | 22  | expressed protein                                  |
| AT1G31930 | 90           | 16  | 18  | 16  | 22  | 12  | 20  | extra-large guanine nucleotide binding protein     |
| AT1G78850 | 110          | 24  | 24  | 18  | 28  | 18  | 18  | curculin-like (mannose-binding) lectin family      |
| AT4G00030 | 245          | 8   | 10  | 10  | 10  | 10  | 14  | plastid-lipid associated protein PAP               |
| AT3G50740 | 103          | 22  | 22  | 20  | 28  | 14  | 20  | UDP-glucuronosyl / UDP-glucosyl transferase family |
| AT3G10340 | 103          | 22  | 20  | 18  | 26  | 18  | 18  | phenylalanine ammonia-lyase, putative              |
| AT4G08170 | 412          | 10  | 10  | 10  | 10  | 10  | 14  | inositol 1,3,4-trisphosphate 5/6-kinase family     |
| AT1G68520 | 93           | 20  |     | 4   | 20  | 16  | 20  | zinc finger (B-box type) family protein            |
| AT4G39680 | 103          | 16  | 22  | 20  |     |     | 14  | SAP domain-containing protein                      |
| AT1G15240 | 86           | 20  | 20  | 16  | 30  | 18  | 20  | phox (PX) domain-containing protein                |
| AT1G64170 | 103          | 20  | 24  | 12  | 30  | 18  | 8   | cation/hydrogen exchanger, putative (CHX16)        |
| AT3G54720 | 136          | 22  | 24  | 22  | 26  | 12  | 22  | glutamate carboxypeptidase, putative (AMP1)        |
| AT2G36980 | 101          | 8   | 20  | 20  | 30  | 18  | 22  | pentatricopeptide (PPR) repeat-containing          |
| AT3G62890 | 94           | 20  | 22  | 16  | 26  | 16  | 16  | pentatricopeptide (PPR) repeat-containing          |

| <b>locus</b>     | <b>Silent Sites</b> | <b>GER</b> | <b>CAN</b> | <b>USA</b> | <b>RUS</b> | <b>SWE</b> | <b>ICE</b> | <b>GO Terms</b>                                  |
|------------------|---------------------|------------|------------|------------|------------|------------|------------|--------------------------------------------------|
| <b>AT4G02390</b> | 287                 | 10         | 10         | 10         | 10         | 10         | 14         | poly (ADP-ribose) polymerase / NAD(+)            |
| <b>AT5G53020</b> | 103                 | 14         | 8          | 8          | 30         | 8          | 10         | expressed protein                                |
| <b>AT1G65450</b> | 100                 | 20         | 24         | 18         | 30         | 14         | 20         | transferase family protein                       |
| <b>AT1G68530</b> | 78                  | 16         | 22         | 18         | 30         | 18         | 18         | very-long-chain fatty acid condensing enzyme     |
| <b>AT4G04350</b> | 313                 | 10         | 10         | 10         | 10         | 10         | 14         | leucyl-tRNA synthetase, putative / leucine--tRNA |
| <b>AT2G43680</b> | 114                 | 10         | 12         | 6          | 26         | 14         |            | calmodulin-binding family protein                |
| <b>AT1G10900</b> | 100                 | 24         | 22         | 16         | 24         | 14         | 18         | phosphatidylinositol-4-phosphate 5-kinase family |
| <b>AT1G62310</b> | 88                  | 16         | 22         | 18         | 26         | 16         | 18         | transcription factor jumonji (jmiC)              |
| <b>AT1G62520</b> | 92                  | 14         | 24         | 18         | 30         | 12         | 14         | expressed protein                                |
| <b>AT4G10340</b> | 386                 | 10         | 10         | 10         | 10         | 10         | 14         | chlorophyll A-B binding protein CP26             |
| <b>AT5G48100</b> | 109                 | 24         | 24         | 22         | 30         | 18         | 22         | laccase family protein / diphenol oxidase family |
| <b>AT1G62390</b> | 97                  | 18         | 20         | 18         | 24         | 10         | 20         | octicosapeptide/Phox/Bem1p (PB1)                 |
| <b>AT4G22720</b> | 271                 | 10         | 10         | 10         | 10         | 10         | 14         | glycoprotease M22 family protein                 |
| <b>AT5G66280</b> | 99                  | 20         | 22         | 22         | 30         | 16         | 18         | GDP-D-mannose 4,6-dehydratase, putative          |
| <b>AT2G46550</b> | 95                  | 20         | 18         | 6          | 30         | 16         | 16         | expressed protein                                |
| <b>AT1G10980</b> | 101                 | 16         | 18         | 14         | 28         | 18         | 14         | expressed protein                                |
| <b>AT4G08840</b> | 89                  | 4          | 20         | 18         | 20         | 18         | 8          | pumilio/Puf RNA-binding domain-containing        |
| <b>AT4G14210</b> | 413                 | 10         | 10         | 10         | 10         | 10         | 14         | phytoene dehydrogenase, chloroplast              |
| <b>AT5G43670</b> | 108                 | 16         | 10         | 16         |            |            | 22         | transport protein, putative                      |
| <b>AT1G01040</b> | 90                  | 18         | 22         | 16         | 26         | 14         | 16         | DEAD/DEAH box helicase carpel factory            |
| <b>AT3G20820</b> | 114                 | 18         | 6          | 4          | 8          | 6          | 16         | leucine-rich repeat family protein               |
| <b>AT5G51670</b> | 120                 | 20         | 18         | 22         |            |            | 12         | expressed protein                                |
| <b>AT4G12030</b> | 279                 | 10         | 10         | 10         | 10         | 10         | 14         | bile acid:sodium symporter family protein        |
| <b>AT4G30950</b> | 331                 | 10         | 10         | 10         | 10         | 10         | 14         | omega-6 fatty acid desaturase, chloroplast       |
| <b>AT2G16870</b> | 111                 | 18         | 18         | 18         | 4          | 10         | 20         | disease resistance protein (TIR-NBS-LRR class)   |
| <b>AT1G03560</b> | 98                  | 22         | 18         | 20         | 30         | 16         | 16         | pentatricopeptide (PPR) repeat-containing        |
| <b>AT5G41920</b> | 108                 | 16         | 16         | 10         |            |            | 6          | scarecrow transcription factor family protein    |
| <b>AT3G48690</b> | 96                  | 24         | 22         | 12         | 24         | 14         | 18         | expressed protein                                |
| <b>AT2G23170</b> | 97                  | 22         | 22         | 8          | 30         | 16         | 16         | auxin-responsive GH3 family protein              |
| <b>AT2G28050</b> | 90                  | 24         | 20         | 18         | 26         | 16         | 22         | pentatricopeptide (PPR) repeat-containing        |
| <b>AT4G14190</b> | 102                 | 16         | 16         | 18         | 26         | 16         | 18         | pentatricopeptide (PPR) repeat-containing        |
| <b>AT1G59720</b> | 99                  | 14         | 12         | 16         | 16         | 10         | 14         | pentatricopeptide (PPR) repeat-containing        |
| <b>AT1G74600</b> | 107                 | 22         | 24         | 16         | 14         | 16         | 20         | pentatricopeptide (PPR) repeat-containing        |
