# Supplementary material for: Patterns of Polymorphism and Demographic History in Natural Populations of Arabidopsis lyrata
Source: PubMed Central journal article supplement (PMC2408968; doi:10.1371/journal.pone.0002411), 2008-06-11
Supplement: pone.0002411.s003.pdf [file pone.0002411.s003.pdf]

**Table S2.**

| <b>locus</b> | <b>pop.</b> | <b>S</b> | $\eta_1$ | $N_h$ | $H_e$ | $\theta_w$ | $\theta_\pi$ | <b>D</b> | $\rho$ |
|--------------|-------------|----------|----------|-------|-------|------------|--------------|----------|--------|
| AT1G01040    | can         | 2        | 0        | 2     | 0.485 | 0.549      | 0.970        | 1.739    |        |
| AT1G03560    | can         | 1        | 1        | 2     | 0.111 | 0.291      | 0.111        | -1.165   |        |
| AT1G04650    | can         | 0        | 0        | 1     | 0.000 | 0.000      | 0.000        |          |        |
| AT1G06520    | can         | 1        | 0        | 2     | 0.268 | 0.282      | 0.268        | -0.086   |        |
| AT1G06530    | can         | 2        | 0        | 3     | 0.649 | 0.536      | 0.808        | 1.118    |        |
| AT1G10900    | can         | 0        | 0        | 1     | 0.000 | 0.000      | 0.000        |          |        |
| AT1G10980    | can         | 0        | 0        | 1     | 0.000 | 0.000      | 0.000        |          |        |
| AT1G11050    | can         | 0        | 0        | 1     | 0.000 | 0.000      | 0.000        |          |        |
| AT1G15240    | can         | 0        | 0        | 1     | 0.000 | 0.000      | 0.000        |          |        |
| AT1G23200    | can         | 0        | 0        | 1     | 0.000 | 0.000      | 0.000        |          |        |
| AT1G31930    | can         | 1        | 1        | 2     | 0.111 | 0.291      | 0.111        | -1.165   |        |
| AT1G59720    | can         | 17       | 1        | 5     | 0.742 | 5.629      | 6.606        | 0.753    | 0      |
| AT1G62310    | can         | 0        | 0        | 1     | 0.000 | 0.000      | 0.000        |          |        |
| AT1G62390    | can         | 1        | 1        | 2     | 0.100 | 0.282      | 0.100        | -1.164   |        |
| AT1G62520    | can         | 0        | 0        | 1     | 0.000 | 0.000      | 0.000        |          |        |
| AT1G64170    | can         | 4        | 0        | 3     | 0.594 | 1.071      | 1.377        | 0.780    | 0      |
| AT1G65450    | can         | 5        | 0        | 4     | 0.665 | 1.352      | 1.680        | 0.709    | 45     |
| AT1G68530    | can         | 1        | 1        | 2     | 0.091 | 0.274      | 0.091        | -1.162   |        |
| AT1G72390    | can         | 0        | 0        | 1     | 0.000 | 0.000      | 0.000        |          |        |
| AT1G74600    | can         | 0        | 0        | 1     | 0.000 | 0.000      | 0.000        |          |        |
| AT1G78850    | can         | 3        | 0        | 5     | 0.819 | 0.803      | 1.293        | 1.535    | 0      |
| AT2G16870    | can         | 1        | 0        | 2     | 0.366 | 0.291      | 0.366        | 0.488    |        |
| AT2G23170    | can         | 2        | 0        | 3     | 0.567 | 0.549      | 1.043        | 2.043    |        |
| AT2G25050    | can         | 0        | 0        | 1     | 0.000 | 0.000      | 0.000        |          |        |
| AT2G26140    | can         | 0        | 0        | 1     | 0.000 | 0.000      | 0.000        |          |        |
| AT2G26730    | can         | 3        | 0        | 4     | 0.582 | 0.943      | 0.890        | -0.173   | 0      |
| AT2G28050    | can         | 0        | 0        | 1     | 0.000 | 0.000      | 0.000        |          |        |
| AT2G36980    | can         | 0        | 0        | 1     | 0.000 | 0.000      | 0.000        |          |        |
| AT2G41360    | can         | 1        | 0        | 2     | 0.337 | 0.282      | 0.337        | 0.352    |        |
| AT2G43680    | can         | 1        | 0        | 2     | 0.545 | 0.331      | 0.545        | 1.486    |        |
| AT2G44990    | can         | 0        | 0        | 1     | 0.000 | 0.000      | 0.000        |          |        |
| AT2G46550    | can         | 0        | 0        | 1     | 0.000 | 0.000      | 0.000        |          |        |
| AT2G47430    | can         | 2        | 0        | 4     | 0.647 | 0.581      | 0.928        | 1.455    |        |
| AT3G10340    | can         | 1        | 0        | 2     | 0.189 | 0.282      | 0.189        | -0.592   |        |
| AT3G13290    | can         | 0        | 0        | 1     | 0.000 | 0.000      | 0.000        |          |        |
| AT3G20820    | can         | 0        | 0        | 1     | 0.000 | 0.000      | 0.000        |          |        |
| AT3G23590    | can         | 0        | 0        | 1     | 0.000 | 0.000      | 0.000        |          |        |
| AT3G44530    | can         | 1        | 0        | 2     | 0.366 | 0.291      | 0.366        | 0.488    |        |
| AT3G48690    | can         | 2        | 0        | 2     | 0.312 | 0.549      | 0.623        | 0.309    |        |
| AT3G50740    | can         | 5        | 0        | 8     | 0.887 | 1.372      | 2.229        | 1.859    | 0      |
| AT3G51570    | can         | 0        | 0        | 1     | 0.000 | 0.000      | 0.000        |          |        |
| AT3G54720    | can         | 2        | 0        | 4     | 0.750 | 0.536      | 0.982        | 1.832    |        |
| AT3G55060    | can         | 0        | 0        | 1     | 0.000 | 0.000      | 0.000        |          |        |
| AT3G62890    | can         | 1        | 0        | 2     | 0.368 | 0.274      | 0.368        | 0.593    |        |
| AT4G00030    | can         | 0        | 0        | 1     | 0.000 | 0.000      | 0.000        |          |        |
| AT4G02390    | can         | 1        | 0        | 2     | 0.533 | 0.353      | 0.533        | 1.303    |        |

| locus     | pop. | S  | $\eta_1$ | $N_h$ | $H_e$ | $\theta_w$ | $\theta_\pi$ | D      | $\rho$ |
|-----------|------|----|----------|-------|-------|------------|--------------|--------|--------|
| AT4G04350 | can  | 0  | 0        | 1     | 0.000 | 0.000      | 0.000        |        |        |
| AT4G08170 | can  | 0  | 0        | 1     | 0.000 | 0.000      | 0.000        |        |        |
| AT4G08840 | can  | 1  | 0        | 2     | 0.521 | 0.282      | 0.521        | 1.531  |        |
| AT4G10340 | can  | 7  | 1        | 4     | 0.644 | 2.474      | 2.333        | -0.241 | 0      |
| AT4G12030 | can  | 33 | 4        | 6     | 0.889 | 11.665     | 15.200       | 1.461  | 0      |
| AT4G14180 | can  | 2  | 2        | 3     | 0.163 | 0.536      | 0.167        | -1.515 |        |
| AT4G14190 | can  | 17 | 17       | 3     | 0.242 | 5.123      | 2.125        | -2.321 | 0      |
| AT4G14210 | can  | 1  | 0        | 2     | 0.356 | 0.353      | 0.356        | 0.015  |        |
| AT4G16280 | can  | 0  | 0        | 1     | 0.000 | 0.000      | 0.000        |        |        |
| AT4G18040 | can  | 4  | 2        | 3     | 0.644 | 1.414      | 1.467        | 0.143  | 0      |
| AT4G18520 | can  | 1  | 0        | 2     | 0.485 | 0.274      | 0.485        | 1.334  |        |
| AT4G20410 | can  | 0  | 0        | 1     | 0.000 | 0.000      | 0.000        |        |        |
| AT4G22720 | can  | 0  | 0        | 1     | 0.000 | 0.000      | 0.000        |        |        |
| AT4G25540 | can  | 0  | 0        | 1     | 0.000 | 0.000      | 0.000        |        |        |
| AT4G28395 | can  | 0  | 0        | 1     | 0.000 | 0.000      | 0.000        |        |        |
| AT4G30950 | can  | 5  | 0        | 2     | 0.467 | 1.767      | 2.333        | 1.284  | 0      |
| AT4G33250 | can  | 4  | 2        | 4     | 0.367 | 1.498      | 1.489        | -0.026 | 0      |
| AT4G36060 | can  | 0  | 0        | 1     | 0.000 | 0.000      | 0.000        |        |        |
| AT4G38160 | can  | 0  | 0        | 1     | 0.000 | 0.000      | 0.000        |        |        |
| AT4G38630 | can  | 2  | 0        | 2     | 0.356 | 0.707      | 0.711        | 0.019  |        |
| AT4G39680 | can  | 0  | 0        | 1     | 0.000 | 0.000      | 0.000        |        |        |
| AT4G40080 | can  | 1  | 0        | 2     | 0.356 | 0.353      | 0.356        | 0.015  |        |
| AT5G04190 | can  | 2  | 1        | 3     | 0.541 | 0.549      | 0.576        | 0.112  |        |
| AT5G20280 | can  | 0  | 0        | 1     | 0.000 | 0.000      | 0.000        |        |        |
| AT5G41920 | can  | 0  | 0        | 1     | 0.000 | 0.000      | 0.000        |        |        |
| AT5G43670 | can  | 9  | 1        | 6     | 0.844 | 3.181      | 3.267        | 0.117  | 0      |
| AT5G48100 | can  | 9  | 0        | 6     | 0.851 | 2.410      | 3.431        | 1.389  | 0      |
| AT5G51670 | can  | 0  | 0        | 1     | 0.000 | 0.000      | 0.000        |        |        |
| AT5G53020 | can  | 1  | 1        | 2     | 0.250 | 0.386      | 0.250        | -1.055 |        |
| AT5G66280 | can  | 1  | 0        | 2     | 0.416 | 0.274      | 0.416        | 0.895  |        |
| AT1G01040 | ger  | 6  | 0        | 4     | 0.791 | 1.744      | 3.176        | 2.703  | 0      |
| AT1G03560 | ger  | 16 | 1        | 6     | 0.632 | 4.389      | 5.416        | 0.849  | 0      |
| AT1G04650 | ger  | 2  | 2        | 3     | 0.216 | 0.581      | 0.222        | -1.508 |        |
| AT1G06520 | ger  | 3  | 2        | 4     | 0.636 | 0.993      | 0.742        | -0.829 |        |
| AT1G06530 | ger  | 1  | 0        | 2     | 0.173 | 0.274      | 0.173        | -0.641 |        |
| AT1G10900 | ger  | 7  | 0        | 9     | 0.870 | 1.875      | 2.424        | 0.916  | 3      |
| AT1G10980 | ger  | 10 | 2        | 12    | 0.967 | 3.014      | 3.367        | 0.437  | 9      |
| AT1G11050 | ger  | 2  | 2        | 3     | 0.177 | 0.549      | 0.182        | -1.515 |        |
| AT1G15240 | ger  | 4  | 1        | 4     | 0.642 | 1.127      | 1.205        | 0.200  |        |
| AT1G23200 | ger  | 2  | 0        | 3     | 0.545 | 0.662      | 0.606        | -0.248 |        |
| AT1G31930 | ger  | 3  | 1        | 4     | 0.692 | 0.904      | 0.975        | 0.227  |        |
| AT1G59720 | ger  | 28 | 8        | 12    | 0.967 | 8.805      | 9.341        | 0.260  | 3      |
| AT1G62310 | ger  | 9  | 4        | 7     | 0.792 | 2.712      | 2.183        | -0.716 | 0      |
| AT1G62390 | ger  | 6  | 1        | 5     | 0.758 | 1.744      | 2.627        | 1.667  | 0      |
| AT1G62520 | ger  | 6  | 0        | 7     | 0.912 | 1.887      | 2.385        | 0.947  | 0      |
| AT1G64170 | ger  | 8  | 3        | 5     | 0.626 | 2.255      | 1.474        | -1.168 | 0      |
| AT1G65450 | ger  | 7  | 2        | 10    | 0.911 | 1.973      | 1.916        | -0.095 | 92     |
| AT1G68520 | ger  | 7  | 1        | 4     | 0.437 | 1.973      | 1.237        | -1.227 | 0      |

| locus     | pop. | S  | $\eta_1$ | $N_h$ | $H_e$ | $\theta_w$ | $\theta_\pi$ | D      | $\rho$ |
|-----------|------|----|----------|-------|-------|------------|--------------|--------|--------|
| AT1G68530 | ger  | 4  | 1        | 5     | 0.817 | 1.205      | 1.675        | 1.219  |        |
| AT1G72390 | ger  | 0  | 0        | 1     | 0.000 | 0.000      | 0.000        |        |        |
| AT1G74600 | ger  | 21 | 0        | 5     | 0.792 | 5.761      | 10.584       | 3.126  | 0      |
| AT1G78850 | ger  | 3  | 0        | 4     | 0.764 | 0.803      | 1.210        | 1.274  |        |
| AT2G16870 | ger  | 13 | 3        | 13    | 0.967 | 3.780      | 5.052        | 1.256  | 23     |
| AT2G23170 | ger  | 15 | 0        | 14    | 0.965 | 4.115      | 5.775        | 1.455  | 4      |
| AT2G25050 | ger  | 2  | 0        | 3     | 0.518 | 0.536      | 0.692        | 0.642  |        |
| AT2G26140 | ger  | 0  | 0        | 1     | 0.000 | 0.000      | 0.000        |        |        |
| AT2G26730 | ger  | 4  | 4        | 3     | 0.216 | 1.163      | 0.444        | -1.853 |        |
| AT2G28050 | ger  | 18 | 2        | 22    | 0.993 | 4.820      | 6.547        | 1.292  | 22     |
| AT2G36980 | ger  | 4  | 1        | 6     | 0.929 | 1.543      | 1.643        | 0.283  |        |
| AT2G41360 | ger  | 1  | 0        | 2     | 0.416 | 0.274      | 0.416        | 0.895  |        |
| AT2G43680 | ger  | 8  | 4        | 4     | 0.778 | 2.828      | 2.578        | -0.382 | 1      |
| AT2G44990 | ger  | 1  | 1        | 2     | 0.167 | 0.331      | 0.167        | -1.141 |        |
| AT2G46550 | ger  | 7  | 0        | 7     | 0.863 | 1.973      | 2.963        | 1.650  | 0      |
| AT2G47430 | ger  | 2  | 1        | 3     | 0.416 | 0.564      | 0.437        | -0.528 |        |
| AT3G10340 | ger  | 5  | 2        | 7     | 0.792 | 1.372      | 1.225        | -0.317 | 100    |
| AT3G13290 | ger  | 2  | 1        | 3     | 0.385 | 0.629      | 0.407        | -0.959 |        |
| AT3G20820 | ger  | 10 | 0        | 12    | 0.935 | 2.907      | 4.124        | 1.507  | 47     |
| AT3G23590 | ger  | 2  | 0        | 3     | 0.507 | 0.536      | 0.551        | 0.062  |        |
| AT3G44530 | ger  | 0  | 0        | 1     | 0.000 | 0.000      | 0.000        |        |        |
| AT3G48690 | ger  | 13 | 2        | 15    | 0.946 | 3.481      | 5.442        | 1.954  | 12     |
| AT3G50740 | ger  | 4  | 1        | 7     | 0.766 | 1.097      | 1.199        | 0.261  |        |
| AT3G51570 | ger  | 1  | 0        | 2     | 0.303 | 0.331      | 0.303        | -0.195 |        |
| AT3G54720 | ger  | 5  | 0        | 8     | 0.896 | 1.372      | 2.117        | 1.615  | 0      |
| AT3G55060 | ger  | 5  | 3        | 6     | 0.667 | 1.372      | 0.900        | -1.021 | 0      |
| AT3G62890 | ger  | 6  | 0        | 4     | 0.500 | 1.691      | 1.532        | -0.301 | 4      |
| AT4G00030 | ger  | 6  | 1        | 7     | 0.964 | 2.314      | 2.750        | 0.878  | 4      |
| AT4G02390 | ger  | 14 | 2        | 4     | 0.533 | 4.949      | 4.778        | -0.158 | 4      |
| AT4G04350 | ger  | 18 | 2        | 5     | 0.756 | 6.427      | 6.898        | 0.345  | 0      |
| AT4G08170 | ger  | 12 | 4        | 7     | 0.933 | 4.242      | 5.111        | 0.926  | 5      |
| AT4G08840 | ger  | 5  | 2        | 3     | 0.833 | 2.727      | 3.000        | 0.956  | 3      |
| AT4G10340 | ger  | 26 | 7        | 10    | 1.000 | 9.191      | 10.067       | 0.455  | 41     |
| AT4G12030 | ger  | 29 | 7        | 8     | 0.933 | 10.251     | 11.178       | 0.433  | 2      |
| AT4G14180 | ger  | 1  | 0        | 2     | 0.464 | 0.268      | 0.464        | 1.232  |        |
| AT4G14190 | ger  | 20 | 1        | 10    | 0.933 | 6.027      | 7.658        | 1.089  | 3      |
| AT4G14210 | ger  | 31 | 9        | 7     | 0.911 | 11.534     | 14.189       | 1.165  | 3      |
| AT4G16280 | ger  | 0  | 0        | 1     | 0.000 | 0.000      | 0.000        |        |        |
| AT4G18040 | ger  | 3  | 0        | 3     | 0.733 | 1.060      | 1.533        | 1.604  |        |
| AT4G18520 | ger  | 1  | 0        | 2     | 0.525 | 0.301      | 0.525        | 1.474  |        |
| AT4G20410 | ger  | 7  | 4        | 5     | 0.756 | 2.474      | 1.978        | -0.850 | 13     |
| AT4G22720 | ger  | 17 | 0        | 6     | 0.911 | 6.201      | 7.867        | 1.289  | 13     |
| AT4G25540 | ger  | 1  | 1        | 2     | 0.200 | 0.353      | 0.200        | -1.112 |        |
| AT4G28395 | ger  | 11 | 9        | 5     | 0.100 | 3.985      | 2.795        | -1.370 | 11     |
| AT4G30950 | ger  | 32 | 3        | 8     | 0.956 | 11.312     | 13.933       | 1.116  | 11     |
| AT4G33250 | ger  | 11 | 7        | 7     | 0.633 | 4.599      | 3.745        | -0.983 | 9      |
| AT4G36060 | ger  | 2  | 1        | 3     | 0.600 | 0.707      | 0.667        | -0.184 |        |
| AT4G38160 | ger  | 2  | 1        | 3     | 0.236 | 0.536      | 0.243        | -1.202 |        |

| locus     | pop. | S  | $\eta_1$ | $N_h$ | $H_e$ | $\theta_w$ | $\theta_\pi$ | D      | $\rho$ |
|-----------|------|----|----------|-------|-------|------------|--------------|--------|--------|
| AT4G38630 | ger  | 1  | 0        | 2     | 0.356 | 0.353      | 0.356        | 0.015  |        |
| AT4G39680 | ger  | 3  | 0        | 3     | 0.658 | 0.904      | 1.392        | 1.563  |        |
| AT4G40080 | ger  | 4  | 1        | 4     | 0.733 | 1.498      | 1.444        | -0.147 |        |
| AT5G04190 | ger  | 3  | 1        | 5     | 0.468 | 0.823      | 0.649        | -0.546 |        |
| AT5G20280 | ger  | 4  | 3        | 4     | 0.571 | 1.097      | 0.779        | -0.814 |        |
| AT5G41920 | ger  | 13 | 0        | 7     | 0.867 | 3.918      | 6.050        | 2.099  | 0      |
| AT5G43670 | ger  | 13 | 4        | 10    | 0.925 | 3.918      | 3.733        | -0.182 | 10     |
| AT5G48100 | ger  | 9  | 1        | 8     | 0.826 | 2.410      | 2.920        | 0.694  | 4      |
| AT5G51670 | ger  | 13 | 1        | 14    | 0.968 | 3.664      | 4.747        | 1.072  | 9      |
| AT5G53020 | ger  | 11 | 8        | 7     | 0.758 | 3.459      | 1.934        | -1.738 | 2      |
| AT5G66280 | ger  | 6  | 0        | 5     | 0.758 | 1.691      | 2.926        | 2.327  | 0      |
| AT1G01040 | ice  | 2  | 0        | 3     | 0.633 | 0.603      | 0.767        | 0.696  |        |
| AT1G03560 | ice  | 15 | 0        | 4     | 0.600 | 4.520      | 3.667        | -0.740 | 0      |
| AT1G04650 | ice  | 0  | 0        | 1     | 0.000 | 0.000      | 0.000        |        |        |
| AT1G06520 | ice  | 0  | 0        | 1     | 0.000 | 0.000      | 0.000        |        |        |
| AT1G06530 | ice  | 1  | 0        | 2     | 0.485 | 0.274      | 0.485        | 1.334  |        |
| AT1G10900 | ice  | 5  | 0        | 4     | 0.542 | 1.454      | 1.301        | -0.333 | 2      |
| AT1G10980 | ice  | 2  | 2        | 2     | 0.143 | 0.629      | 0.286        | -1.481 |        |
| AT1G11050 | ice  | 1  | 1        | 2     | 0.111 | 0.291      | 0.111        | -1.165 |        |
| AT1G15240 | ice  | 0  | 0        | 1     | 0.000 | 0.000      | 0.000        |        |        |
| AT1G23200 | ice  | 2  | 0        | 2     | 0.533 | 0.876      | 1.067        | 1.032  |        |
| AT1G31930 | ice  | 3  | 0        | 3     | 0.626 | 0.846      | 1.068        | 0.704  | 0      |
| AT1G59720 | ice  | 21 | 5        | 8     | 0.934 | 6.604      | 7.890        | 0.817  | 4      |
| AT1G62310 | ice  | 1  | 0        | 2     | 0.294 | 0.291      | 0.294        | 0.022  |        |
| AT1G62390 | ice  | 6  | 5        | 4     | 0.521 | 1.700      | 1.029        | -1.264 | 0      |
| AT1G62520 | ice  | 2  | 0        | 3     | 0.659 | 0.629      | 0.791        | 0.700  |        |
| AT1G64170 | ice  | 2  | 0        | 2     | 0.536 | 0.771      | 1.071        | 1.449  |        |
| AT1G65450 | ice  | 5  | 0        | 6     | 0.832 | 1.409      | 2.053        | 1.397  | 0      |
| AT1G68520 | ice  | 0  | 0        | 1     | 0.000 | 0.000      | 0.000        |        |        |
| AT1G68530 | ice  | 0  | 0        | 1     | 0.000 | 0.000      | 0.000        |        |        |
| AT1G72390 | ice  | 0  | 0        | 1     | 0.000 | 0.000      | 0.000        |        |        |
| AT1G74600 | ice  | 1  | 0        | 2     | 0.505 | 0.282      | 0.505        | 1.430  |        |
| AT1G78850 | ice  | 2  | 0        | 4     | 0.765 | 0.581      | 1.007        | 1.784  |        |
| AT2G16870 | ice  | 9  | 0        | 4     | 0.574 | 2.537      | 4.311        | 2.404  | 0      |
| AT2G23170 | ice  | 11 | 0        | 3     | 0.592 | 3.315      | 5.858        | 2.899  | 0      |
| AT2G25050 | ice  | 1  | 0        | 2     | 0.495 | 0.314      | 0.495        | 1.212  |        |
| AT2G26140 | ice  | 0  | 0        | 1     | 0.000 | 0.000      | 0.000        |        |        |
| AT2G26730 | ice  | 6  | 3        | 7     | 0.802 | 1.887      | 1.758        | -0.244 | 6      |
| AT2G28050 | ice  | 5  | 1        | 4     | 0.697 | 1.372      | 1.753        | 0.827  | 0      |
| AT2G36980 | ice  | 5  | 0        | 4     | 0.662 | 1.372      | 1.814        | 0.958  | 2      |
| AT2G41360 | ice  | 0  | 0        | 1     | 0.000 | 0.000      | 0.000        |        |        |
| AT2G44990 | ice  | 0  | 0        | 1     | 0.000 | 0.000      | 0.000        |        |        |
| AT2G46550 | ice  | 1  | 0        | 2     | 0.458 | 0.301      | 0.458        | 1.034  |        |
| AT2G47430 | ice  | 2  | 0        | 2     | 0.538 | 0.629      | 1.077        | 1.933  |        |
| AT3G10340 | ice  | 1  | 0        | 2     | 0.529 | 0.291      | 0.529        | 1.548  |        |
| AT3G13290 | ice  | 2  | 1        | 3     | 0.607 | 0.771      | 0.679        | -0.448 |        |
| AT3G20820 | ice  | 2  | 0        | 4     | 0.692 | 0.603      | 0.850        | 1.050  |        |
| AT3G23590 | ice  | 2  | 0        | 2     | 0.312 | 0.549      | 0.623        | 0.309  |        |

| locus     | pop. | S  | $\eta_1$ | $N_h$ | $H_e$ | $\theta_w$ | $\theta_\pi$ | D      | $\rho$ |
|-----------|------|----|----------|-------|-------|------------|--------------|--------|--------|
| AT3G44530 | ice  | 1  | 1        | 2     | 0.111 | 0.291      | 0.111        | -1.165 |        |
| AT3G48690 | ice  | 15 | 2        | 8     | 0.856 | 4.361      | 6.373        | 1.749  | 0      |
| AT3G50740 | ice  | 9  | 0        | 7     | 0.737 | 2.537      | 3.063        | 0.713  | 0      |
| AT3G51570 | ice  | 4  | 0        | 5     | 0.791 | 1.163      | 1.895        | 1.889  | 0      |
| AT3G54720 | ice  | 2  | 0        | 2     | 0.312 | 0.549      | 0.623        | 0.309  |        |
| AT3G55060 | ice  | 2  | 0        | 4     | 0.693 | 0.549      | 0.900        | 1.453  |        |
| AT3G62890 | ice  | 9  | 0        | 11    | 0.950 | 2.725      | 4.445        | 2.328  | 10     |
| AT4G00030 | ice  | 8  | 2        | 3     | 0.538 | 2.516      | 3.253        | 1.105  | 0      |
| AT4G02390 | ice  | 5  | 0        | 3     | 0.604 | 1.572      | 2.681        | 2.442  | 0      |
| AT4G04350 | ice  | 2  | 1        | 3     | 0.385 | 0.629      | 0.505        | -0.532 |        |
| AT4G08170 | ice  | 5  | 0        | 2     | 0.527 | 1.572      | 2.637        | 2.345  | 0      |
| AT4G08840 | ice  | 0  | 0        | 1     | 0.000 | 0.000      | 0.000        |        |        |
| AT4G10340 | ice  | 15 | 0        | 6     | 0.868 | 4.717      | 6.407        | 1.461  | 0      |
| AT4G12030 | ice  | 37 | 1        | 6     | 0.747 | 11.635     | 14.912       | 1.221  | 0      |
| AT4G14180 | ice  | 1  | 0        | 2     | 0.247 | 0.274      | 0.247        | -0.175 |        |
| AT4G14190 | ice  | 4  | 0        | 2     | 0.471 | 1.163      | 1.882        | 1.855  | 0      |
| AT4G14210 | ice  | 6  | 0        | 3     | 0.615 | 1.887      | 2.374        | 0.926  | 0      |
| AT4G16280 | ice  | 0  | 0        | 1     | 0.000 | 0.000      | 0.000        |        |        |
| AT4G18040 | ice  | 7  | 0        | 4     | 0.648 | 2.201      | 3.297        | 1.837  | 0      |
| AT4G18520 | ice  | 1  | 0        | 2     | 0.209 | 0.291      | 0.209        | -0.529 |        |
| AT4G20410 | ice  | 10 | 1        | 9     | 0.654 | 3.216      | 4.063        | 1.049  | 6      |
| AT4G22720 | ice  | 7  | 0        | 5     | 0.835 | 2.201      | 2.857        | 1.100  | 7      |
| AT4G25540 | ice  | 2  | 0        | 2     | 0.264 | 0.629      | 0.527        | -0.438 |        |
| AT4G28395 | ice  | 15 | 0        | 3     | 0.560 | 4.717      | 5.275        | 0.482  | 7      |
| AT4G30950 | ice  | 6  | 0        | 3     | 0.484 | 1.887      | 1.758        | -0.244 | 0      |
| AT4G33250 | ice  | 1  | 0        | 2     | 0.440 | 0.314      | 0.440        | 0.842  |        |
| AT4G36060 | ice  | 3  | 1        | 3     | 0.385 | 0.943      | 0.670        | -0.886 | 0      |
| AT4G38160 | ice  | 0  | 0        | 1     | 0.000 | 0.000      | 0.000        |        |        |
| AT4G38630 | ice  | 2  | 0        | 2     | 0.538 | 0.629      | 1.077        | 1.933  |        |
| AT4G39680 | ice  | 0  | 0        | 1     | 0.000 | 0.000      | 0.000        |        |        |
| AT4G40080 | ice  | 4  | 4        | 2     | 0.143 | 1.258      | 0.571        | -1.798 | 0      |
| AT5G04190 | ice  | 5  | 0        | 2     | 0.429 | 1.928      | 2.143        | 0.504  | 0      |
| AT5G20280 | ice  | 3  | 0        | 6     | 0.797 | 0.823      | 1.143        | 1.005  | 0      |
| AT5G41920 | ice  | 4  | 0        | 2     | 0.533 | 1.752      | 2.133        | 1.181  | 0      |
| AT5G43670 | ice  | 10 | 0        | 13    | 0.952 | 2.743      | 4.316        | 1.955  | 0      |
| AT5G48100 | ice  | 7  | 2        | 3     | 0.255 | 1.920      | 1.342        | -0.964 | 0      |
| AT5G51670 | ice  | 9  | 0        | 3     | 0.545 | 2.980      | 2.727        | -0.345 | 0      |
| AT5G53020 | ice  | 6  | 0        | 3     | 0.733 | 2.121      | 2.800        | 1.325  | 0      |
| AT5G66280 | ice  | 6  | 0        | 2     | 0.209 | 1.744      | 1.255        | -0.924 | 0      |
| AT1G01040 | rus  | 0  | 0        | 1     | 0.000 | 0.000      | 0.000        |        |        |
| AT1G03560 | rus  | 15 | 1        | 5     | 0.455 | 3.786      | 4.090        | 0.270  | 0      |
| AT1G04650 | rus  | 0  | 0        | 1     | 0.000 | 0.000      | 0.000        |        |        |
| AT1G06520 | rus  | 0  | 0        | 1     | 0.000 | 0.000      | 0.000        |        |        |
| AT1G10900 | rus  | 0  | 0        | 1     | 0.000 | 0.000      | 0.000        |        |        |
| AT1G10980 | rus  | 4  | 4        | 3     | 0.140 | 1.028      | 0.286        | -1.889 | 0      |
| AT1G11050 | rus  | 8  | 7        | 4     | 0.543 | 2.142      | 1.014        | -1.689 | 0      |
| AT1G15240 | rus  | 3  | 0        | 3     | 0.248 | 0.757      | 0.386        | -1.153 | 0      |
| AT1G23200 | rus  | 6  | 0        | 7     | 0.818 | 1.572      | 2.526        | 1.796  | 0      |

| locus     | pop. | S  | $\eta_1$ | $N_h$ | $H_e$ | $\theta_w$ | $\theta_\pi$ | D      | $\rho$ |
|-----------|------|----|----------|-------|-------|------------|--------------|--------|--------|
| AT1G31930 | rus  | 1  | 0        | 2     | 0.519 | 0.274      | 0.519        | 1.554  |        |
| AT1G59720 | rus  | 11 | 11       | 3     | 0.242 | 3.315      | 1.375        | -2.211 | 0      |
| AT1G62310 | rus  | 0  | 0        | 1     | 0.000 | 0.000      | 0.000        |        |        |
| AT1G62390 | rus  | 1  | 0        | 2     | 0.518 | 0.268      | 0.518        | 1.573  |        |
| AT1G62520 | rus  | 10 | 0        | 7     | 0.864 | 2.524      | 4.634        | 2.648  | 0      |
| AT1G64170 | rus  | 5  | 0        | 4     | 0.754 | 1.262      | 2.483        | 2.639  | 0      |
| AT1G65450 | rus  | 4  | 0        | 4     | 0.600 | 1.010      | 1.480        | 1.197  | 0      |
| AT1G68520 | rus  | 2  | 0        | 2     | 0.189 | 0.583      | 0.423        | -0.667 |        |
| AT1G68530 | rus  | 4  | 0        | 5     | 0.726 | 1.010      | 1.214        | 0.519  | 0      |
| AT1G72390 | rus  | 0  | 0        | 1     | 0.000 | 0.000      | 0.000        |        |        |
| AT1G74600 | rus  | 0  | 0        | 1     | 0.000 | 0.000      | 0.000        |        |        |
| AT1G78850 | rus  | 0  | 0        | 1     | 0.000 | 0.000      | 0.000        |        |        |
| AT2G16870 | rus  | 1  | 0        | 2     | 0.667 | 0.545      | 0.667        | 1.633  |        |
| AT2G23170 | rus  | 0  | 0        | 1     | 0.000 | 0.000      | 0.000        |        |        |
| AT2G25050 | rus  | 0  | 0        | 1     | 0.000 | 0.000      | 0.000        |        |        |
| AT2G26140 | rus  | 2  | 0        | 4     | 0.533 | 0.505      | 0.662        | 0.638  |        |
| AT2G28050 | rus  | 0  | 0        | 1     | 0.000 | 0.000      | 0.000        |        |        |
| AT2G36980 | rus  | 3  | 0        | 4     | 0.600 | 0.757      | 1.110        | 1.097  | 0      |
| AT2G43680 | rus  | 6  | 0        | 4     | 0.763 | 1.572      | 3.102        | 2.879  | 0      |
| AT2G44990 | rus  | 0  | 0        | 1     | 0.000 | 0.000      | 0.000        |        |        |
| AT2G46550 | rus  | 1  | 0        | 2     | 0.515 | 0.252      | 0.515        | 1.621  |        |
| AT3G10340 | rus  | 12 | 0        | 6     | 0.751 | 3.145      | 5.588        | 2.616  | 0      |
| AT3G13290 | rus  | 0  | 0        | 1     | 0.000 | 0.000      | 0.000        |        |        |
| AT3G20820 | rus  | 2  | 1        | 3     | 0.607 | 0.771      | 0.679        | -0.448 |        |
| AT3G23590 | rus  | 0  | 0        | 1     | 0.000 | 0.000      | 0.000        |        |        |
| AT3G44530 | rus  | 0  | 0        | 1     | 0.000 | 0.000      | 0.000        |        |        |
| AT3G48690 | rus  | 6  | 6        | 3     | 0.163 | 1.607      | 0.500        | -2.083 | 0      |
| AT3G50740 | rus  | 0  | 0        | 1     | 0.000 | 0.000      | 0.000        |        |        |
| AT3G51570 | rus  | 0  | 0        | 1     | 0.000 | 0.000      | 0.000        |        |        |
| AT3G54720 | rus  | 0  | 0        | 1     | 0.000 | 0.000      | 0.000        |        |        |
| AT3G55060 | rus  | 2  | 1        | 3     | 0.421 | 0.505      | 0.437        | -0.276 |        |
| AT3G62890 | rus  | 8  | 0        | 7     | 0.806 | 2.096      | 3.194        | 1.646  | 0      |
| AT4G00030 | rus  | 6  | 0        | 2     | 0.533 | 2.121      | 3.200        | 2.105  | 0      |
| AT4G02390 | rus  | 15 | 2        | 5     | 0.400 | 5.387      | 5.200        | -0.162 | 0      |
| AT4G04350 | rus  | 3  | 0        | 2     | 0.467 | 1.145      | 1.467        | 1.092  | 0      |
| AT4G08170 | rus  | 0  | 0        | 1     | 0.000 | 0.000      | 0.000        |        |        |
| AT4G08840 | rus  | 0  | 0        | 1     | 0.000 | 0.000      | 0.000        |        |        |
| AT4G10340 | rus  | 0  | 0        | 1     | 0.000 | 0.000      | 0.000        |        |        |
| AT4G12030 | rus  | 4  | 4        | 2     | 0.200 | 1.414      | 0.800        | -1.667 | 0      |
| AT4G14180 | rus  | 2  | 0        | 3     | 0.283 | 0.524      | 0.295        | -0.935 |        |
| AT4G14190 | rus  | 7  | 0        | 3     | 0.283 | 1.834      | 1.034        | -1.336 | 0      |
| AT4G14210 | rus  | 2  | 1        | 2     | 0.356 | 0.791      | 0.689        | -0.468 |        |
| AT4G16280 | rus  | 2  | 1        | 3     | 0.511 | 0.707      | 0.667        | -0.184 |        |
| AT4G18040 | rus  | 1  | 1        | 2     | 0.200 | 0.353      | 0.200        | -1.112 |        |
| AT4G18520 | rus  | 0  | 0        | 1     | 0.000 | 0.000      | 0.000        |        |        |
| AT4G20410 | rus  | 3  | 3        | 3     | 0.378 | 1.060      | 0.600        | -1.562 | 0      |
| AT4G22720 | rus  | 0  | 0        | 1     | 0.000 | 0.000      | 0.000        |        |        |
| AT4G25540 | rus  | 0  | 0        | 1     | 0.000 | 0.000      | 0.000        |        |        |

| locus     | pop. | S  | $\eta_1$ | $N_h$ | $H_e$ | $\theta_w$ | $\theta_\pi$ | D      | $\rho$ |
|-----------|------|----|----------|-------|-------|------------|--------------|--------|--------|
| AT4G28395 | rus  | 5  | 4        | 3     | 0.378 | 2.021      | 1.556        | -1.056 | 0      |
| AT4G30950 | rus  | 1  | 0        | 1     | 0.000 | 0.438      | 0.600        | 1.174  |        |
| AT4G33250 | rus  | 3  | 1        | 3     | 0.511 | 1.060      | 1.022        | -0.130 | 0      |
| AT4G36060 | rus  | 0  | 0        | 1     | 0.000 | 0.000      | 0.000        |        |        |
| AT4G38160 | rus  | 0  | 0        | 1     | 0.000 | 0.000      | 0.000        |        |        |
| AT4G38630 | rus  | 0  | 0        | 1     | 0.000 | 0.000      | 0.000        |        |        |
| AT4G40080 | rus  | 7  | 3        | 3     | 0.378 | 2.474      | 2.022        | -0.774 | 0      |
| AT5G04190 | rus  | 1  | 0        | 2     | 0.508 | 0.257      | 0.508        | 1.557  |        |
| AT5G20280 | rus  | 0  | 0        | 1     | 0.000 | 0.000      | 0.000        |        |        |
| AT5G48100 | rus  | 4  | 0        | 3     | 0.683 | 1.010      | 1.922        | 2.320  | 0      |
| AT5G53020 | rus  | 0  | 0        | 1     | 0.000 | 0.000      | 0.000        |        |        |
| AT5G66280 | rus  | 3  | 0        | 4     | 0.708 | 0.757      | 1.379        | 1.933  | 0      |
| AT1G01040 | swe  | 2  | 0        | 3     | 0.670 | 0.629      | 0.978        | 1.506  |        |
| AT1G03560 | swe  | 15 | 0        | 3     | 0.567 | 4.520      | 3.667        | -0.740 | 0      |
| AT1G04650 | swe  | 0  | 0        | 1     | 0.000 | 0.000      | 0.000        |        |        |
| AT1G06520 | swe  | 2  | 0        | 4     | 0.803 | 0.662      | 1.061        | 1.758  |        |
| AT1G10900 | swe  | 4  | 0        | 5     | 0.802 | 1.258      | 1.978        | 1.886  | 0      |
| AT1G10980 | swe  | 2  | 0        | 3     | 0.601 | 0.581      | 0.732        | 0.632  |        |
| AT1G11050 | swe  | 0  | 0        | 1     | 0.000 | 0.000      | 0.000        |        |        |
| AT1G15240 | swe  | 0  | 0        | 1     | 0.000 | 0.000      | 0.000        |        |        |
| AT1G23200 | swe  | 3  | 0        | 5     | 0.788 | 0.993      | 1.227        | 0.772  | 0      |
| AT1G31930 | swe  | 0  | 0        | 1     | 0.000 | 0.000      | 0.000        |        |        |
| AT1G59720 | swe  | 6  | 0        | 4     | 0.800 | 2.121      | 3.200        | 2.105  | 0      |
| AT1G62310 | swe  | 0  | 0        | 1     | 0.000 | 0.000      | 0.000        |        |        |
| AT1G62390 | swe  | 6  | 5        | 4     | 0.644 | 2.121      | 1.356        | -1.493 | 0      |
| AT1G62520 | swe  | 4  | 0        | 5     | 0.848 | 1.325      | 1.636        | 0.828  | 0      |
| AT1G64170 | swe  | 3  | 0        | 3     | 0.686 | 0.872      | 1.275        | 1.279  | 0      |
| AT1G65450 | swe  | 1  | 0        | 2     | 0.495 | 0.314      | 0.495        | 1.212  |        |
| AT1G68520 | swe  | 0  | 0        | 1     | 0.000 | 0.000      | 0.000        |        |        |
| AT1G68530 | swe  | 3  | 0        | 6     | 0.856 | 0.872      | 1.431        | 1.778  | 0      |
| AT1G72390 | swe  | 0  | 0        | 1     | 0.000 | 0.000      | 0.000        |        |        |
| AT1G74600 | swe  | 1  | 0        | 2     | 0.325 | 0.301      | 0.325        | 0.156  |        |
| AT1G78850 | swe  | 2  | 0        | 3     | 0.392 | 0.581      | 0.418        | -0.685 |        |
| AT2G16870 | swe  | 13 | 4        | 9     | 0.978 | 4.628      | 4.860        | 0.231  | 20     |
| AT2G23170 | swe  | 13 | 0        | 5     | 0.733 | 3.918      | 3.333        | -0.575 | 0      |
| AT2G25050 | swe  | 1  | 0        | 2     | 0.440 | 0.314      | 0.440        | 0.842  |        |
| AT2G26140 | swe  | 0  | 0        | 1     | 0.000 | 0.000      | 0.000        |        |        |
| AT2G28050 | swe  | 8  | 4        | 8     | 0.875 | 2.411      | 2.467        | 0.083  | 0      |
| AT2G36980 | swe  | 3  | 0        | 3     | 0.464 | 0.872      | 0.797        | -0.238 | 0      |
| AT2G43680 | swe  | 2  | 2        | 2     | 0.143 | 0.629      | 0.286        | -1.481 |        |
| AT2G44990 | swe  | 0  | 0        | 1     | 0.000 | 0.000      | 0.000        |        |        |
| AT2G46550 | swe  | 3  | 0        | 4     | 0.775 | 0.904      | 1.175        | 0.869  | 0      |
| AT3G10340 | swe  | 1  | 0        | 2     | 0.425 | 0.291      | 0.425        | 0.870  |        |
| AT3G13290 | swe  | 1  | 0        | 2     | 0.209 | 0.291      | 0.209        | -0.529 |        |
| AT3G20820 | swe  | 5  | 3        | 3     | 0.733 | 2.190      | 2.067        | -0.315 | 0      |
| AT3G23590 | swe  | 2  | 0        | 2     | 0.294 | 0.581      | 0.588        | 0.028  |        |
| AT3G44530 | swe  | 0  | 0        | 1     | 0.000 | 0.000      | 0.000        |        |        |
| AT3G48690 | swe  | 1  | 0        | 2     | 0.363 | 0.314      | 0.363        | 0.324  |        |

| locus     | pop. | S  | $\eta_1$ | $N_h$ | $H_e$  | $\theta_w$ | $\theta_\pi$ | D      | $\rho$ |
|-----------|------|----|----------|-------|--------|------------|--------------|--------|--------|
| AT3G50740 | swe  | 3  | 0        | 4     | 0.758  | 0.943      | 1.484        | 1.753  | 0      |
| AT3G51570 | swe  | 3  | 0        | 4     | 0.680  | 0.872      | 1.307        | 1.383  | 0      |
| AT3G54720 | swe  | 0  | 0        | 1     | 0.000  | 0.000      | 0.000        |        |        |
| AT3G55060 | swe  | 2  | 1        | 3     | 0.575  | 0.603      | 0.650        | 0.201  |        |
| AT3G62890 | swe  | 6  | 6        | 3     | 0.242  | 1.808      | 0.750        | -2.003 | 0      |
| AT4G00030 | swe  | 3  | 0        | 2     | 0.467  | 1.060      | 1.400        | 1.152  | 0      |
| AT4G02390 | swe  | 2  | 0        | 3     | 0.511  | 0.707      | 0.822        | 0.526  |        |
| AT4G04350 | swe  | 1  | 0        | 2     | 0.222  | 0.386      | 0.429        | 0.311  |        |
| AT4G08170 | swe  | 6  | 0        | 2     | 0.556  | 2.121      | 3.333        | 2.365  | 0      |
| AT4G08840 | swe  | 0  | 0        | 1     | 0.000  | 0.000      | 0.000        |        |        |
| AT4G10340 | swe  | 3  | 0        | 2     | 0.356  | 1.060      | 1.067        | 0.021  | 0      |
| AT4G12030 | swe  | 0  | 0        | 1     | 0.000  | 0.000      | 0.000        |        |        |
| AT4G14180 | swe  | 2  | 0        | 4     | 0.725  | 0.603      | 0.925        | 1.369  |        |
| AT4G14190 | swe  | 18 | 0        | 7     | 0.892  | 5.425      | 8.308        | 2.119  | 0      |
| AT4G14210 | swe  | 0  | 0        | 1     | 0.000  | 0.000      | 0.000        |        |        |
| AT4G16280 | swe  | 3  | 0        | 4     | 0.822  | 1.060      | 1.356        | 1.001  | 0      |
| AT4G18040 | swe  | 2  | 0        | 3     | 0.511  | 0.707      | 0.822        | 0.526  |        |
| AT4G18520 | swe  | 0  | 0        | 1     | 0.000  | 0.000      | 0.000        |        |        |
| AT4G20410 | swe  | 5  | 2        | 3     | 0.600  | 1.767      | 1.867        | 0.225  | 3      |
| AT4G22720 | swe  | 7  | 2        | 5     | 0.844  | 2.474      | 2.356        | -0.203 | 3      |
| AT4G25540 | swe  | 1  | 0        | 2     | 0.356  | 0.353      | 0.356        | 0.015  |        |
| AT4G28395 | swe  | 14 | 11       | 6     | 0.744  | 5.310      | 4.233        | -0.996 | 4      |
| AT4G30950 | swe  | 1  | 0        | 2     | 0.467  | 0.353      | 0.467        | 0.820  |        |
| AT4G33250 | swe  | 0  | 0        | 1     | 0.000  | 0.000      | 0.000        |        |        |
| AT4G36060 | swe  | 1  | 0        | 2     | 0.356  | 0.353      | 0.356        | 0.015  |        |
| AT4G38160 | swe  | 0  | 0        | 1     | 0.000  | 0.000      | 0.000        |        |        |
| AT4G38630 | swe  | 0  | 0        | 1     | 0.000  | 0.000      | 0.000        |        |        |
| AT4G40080 | swe  | 6  | 0        | 4     | -0.033 | 2.205      | 2.422        | 0.423  | 0      |
| AT5G04190 | swe  | 8  | 0        | 4     | 0.821  | 3.085      | 3.536        | 0.706  | 0      |
| AT5G20280 | swe  | 3  | 0        | 6     | 0.879  | 0.993      | 1.591        | 1.973  | 0      |
| AT5G48100 | swe  | 6  | 0        | 5     | 0.556  | 1.744      | 1.595        | -0.282 | 2      |
| AT5G53020 | swe  | 7  | 0        | 2     | 0.571  | 2.700      | 4.000        | 2.292  | 0      |
| AT5G66280 | swe  | 0  | 0        | 1     | 0.000  | 0.000      | 0.000        |        |        |
| AT1G01040 | usa  | 1  | 0        | 2     | 0.233  | 0.301      | 0.233        | -0.448 |        |
| AT1G03560 | usa  | 1  | 0        | 2     | 0.189  | 0.282      | 0.189        | -0.592 |        |
| AT1G04650 | usa  | 0  | 0        | 1     | 0.000  | 0.000      | 0.000        |        |        |
| AT1G06520 | usa  | 1  | 1        | 2     | 0.111  | 0.291      | 0.111        | -1.165 |        |
| AT1G06530 | usa  | 1  | 0        | 2     | 0.356  | 0.353      | 0.356        | 0.015  |        |
| AT1G10900 | usa  | 6  | 0        | 5     | 0.742  | 1.808      | 3.150        | 2.540  | 0      |
| AT1G10980 | usa  | 0  | 0        | 1     | 0.000  | 0.000      | 0.000        |        |        |
| AT1G11050 | usa  | 0  | 0        | 1     | 0.000  | 0.000      | 0.000        |        |        |
| AT1G15240 | usa  | 0  | 0        | 1     | 0.000  | 0.000      | 0.000        |        |        |
| AT1G23200 | usa  | 2  | 0        | 4     | 0.822  | 0.707      | 1.111        | 1.844  |        |
| AT1G31930 | usa  | 1  | 1        | 2     | 0.125  | 0.301      | 0.125        | -1.162 |        |
| AT1G59720 | usa  | 4  | 0        | 3     | 0.433  | 1.205      | 0.933        | -0.706 | 0      |
| AT1G62310 | usa  | 0  | 0        | 1     | 0.000  | 0.000      | 0.000        |        |        |
| AT1G62390 | usa  | 1  | 0        | 2     | 0.425  | 0.291      | 0.425        | 0.870  |        |
| AT1G62520 | usa  | 5  | 0        | 4     | 0.739  | 1.454      | 2.516        | 2.314  | 0      |



| locus     | pop. | S  | $\eta_1$ | $N_h$ | $H_e$ | $\theta_w$ | $\theta_\pi$ | D      | $\rho$ |
|-----------|------|----|----------|-------|-------|------------|--------------|--------|--------|
| AT1G64170 | usa  | 0  | 0        | 1     | 0.000 | 0.000      | 0.000        |        |        |
| AT1G65450 | usa  | 6  | 0        | 9     | 0.902 | 1.744      | 2.739        | 1.876  | 10     |
| AT1G68520 | usa  | 0  | 0        | 1     | 0.000 | 0.000      | 0.000        |        |        |
| AT1G68530 | usa  | 0  | 0        | 1     | 0.000 | 0.000      | 0.000        |        |        |
| AT1G72390 | usa  | 0  | 0        | 1     | 0.000 | 0.000      | 0.000        |        |        |
| AT1G74600 | usa  | 0  | 0        | 1     | 0.000 | 0.000      | 0.000        |        |        |
| AT1G78850 | usa  | 0  | 0        | 1     | 0.000 | 0.000      | 0.000        |        |        |
| AT2G16870 | usa  | 0  | 0        | 1     | 0.000 | 0.000      | 0.000        |        |        |
| AT2G23170 | usa  | 0  | 0        | 1     | 0.000 | 0.000      | 0.000        |        |        |
| AT2G25050 | usa  | 0  | 0        | 1     | 0.000 | 0.000      | 0.000        |        |        |
| AT2G26140 | usa  | 0  | 0        | 1     | 0.000 | 0.000      | 0.000        |        |        |
| AT2G26730 | usa  | 4  | 0        | 3     | 0.682 | 1.325      | 1.636        | 0.828  | 0      |
| AT2G28050 | usa  | 0  | 0        | 1     | 0.000 | 0.000      | 0.000        |        |        |
| AT2G36980 | usa  | 4  | 0        | 3     | 0.358 | 1.127      | 0.758        | -0.949 | 0      |
| AT2G41360 | usa  | 1  | 0        | 2     | 0.440 | 0.314      | 0.440        | 0.842  |        |
| AT2G43680 | usa  | 0  | 0        | 1     | 0.000 | 0.000      | 0.000        |        |        |
| AT2G44990 | usa  | 0  | 0        | 1     | 0.000 | 0.000      | 0.000        |        |        |
| AT2G46550 | usa  | 0  | 0        | 1     | 0.000 | 0.000      | 0.000        |        |        |
| AT2G47430 | usa  | 2  | 0        | 4     | 0.647 | 0.564      | 1.026        | 1.924  |        |
| AT3G10340 | usa  | 1  | 0        | 2     | 0.523 | 0.291      | 0.523        | 1.505  |        |
| AT3G13290 | usa  | 0  | 0        | 1     | 0.000 | 0.000      | 0.000        |        |        |
| AT3G20820 | usa  | 1  | 0        | 2     | 0.667 | 0.545      | 0.667        | 1.633  |        |
| AT3G23590 | usa  | 0  | 0        | 1     | 0.000 | 0.000      | 0.000        |        |        |
| AT3G44530 | usa  | 1  | 0        | 2     | 0.366 | 0.291      | 0.366        | 0.488  |        |
| AT3G48690 | usa  | 4  | 0        | 6     | 0.848 | 1.325      | 1.939        | 1.633  | 0      |
| AT3G50740 | usa  | 4  | 0        | 5     | 0.800 | 1.127      | 1.705        | 1.484  | 0      |
| AT3G51570 | usa  | 0  | 0        | 1     | 0.000 | 0.000      | 0.000        |        |        |
| AT3G54720 | usa  | 1  | 0        | 2     | 0.416 | 0.274      | 0.416        | 0.895  |        |
| AT3G55060 | usa  | 0  | 0        | 1     | 0.000 | 0.000      | 0.000        |        |        |
| AT3G62890 | usa  | 0  | 0        | 1     | 0.000 | 0.000      | 0.000        |        |        |
| AT4G00030 | usa  | 0  | 0        | 1     | 0.000 | 0.000      | 0.000        |        |        |
| AT4G02390 | usa  | 1  | 0        | 2     | 0.533 | 0.353      | 0.533        | 1.303  |        |
| AT4G04350 | usa  | 2  | 1        | 3     | 0.600 | 0.707      | 0.733        | 0.120  |        |
| AT4G08170 | usa  | 0  | 0        | 1     | 0.000 | 0.000      | 0.000        |        |        |
| AT4G08840 | usa  | 2  | 0        | 4     | 0.778 | 0.581      | 1.026        | 1.866  |        |
| AT4G10340 | usa  | 10 | 1        | 6     | 0.889 | 3.535      | 3.511        | -0.030 | 0      |
| AT4G12030 | usa  | 28 | 0        | 2     | 0.533 | 9.898      | 14.933       | 2.436  | 0      |
| AT4G14180 | usa  | 0  | 0        | 1     | 0.000 | 0.000      | 0.000        |        |        |
| AT4G14190 | usa  | 11 | 0        | 3     | 0.392 | 3.198      | 2.301        | -1.024 | 0      |
| AT4G14210 | usa  | 2  | 1        | 3     | 0.511 | 0.707      | 0.556        | -0.691 |        |
| AT4G16280 | usa  | 1  | 0        | 2     | 0.467 | 0.353      | 0.467        | 0.820  |        |
| AT4G18040 | usa  | 6  | 0        | 3     | 0.622 | 2.121      | 2.844        | 1.411  | 1      |
| AT4G18520 | usa  | 1  | 0        | 2     | 0.529 | 0.291      | 0.529        | 1.548  |        |
| AT4G20410 | usa  | 0  | 0        | 1     | 0.000 | 0.000      | 0.000        |        |        |
| AT4G22720 | usa  | 11 | 2        | 5     | 0.800 | 3.888      | 4.556        | 0.768  | 0      |
| AT4G25540 | usa  | 0  | 0        | 1     | 0.000 | 0.000      | 0.000        |        |        |
| AT4G28395 | usa  | 0  | 0        | 1     | 0.000 | 0.000      | 0.000        |        |        |
| AT4G30950 | usa  | 6  | 1        | 3     | 0.600 | 2.121      | 2.867        | 1.455  | 0      |

| <b>locus</b> | <b>pop.</b> | <b>S</b> | $\eta_1$ | $N_h$ | $H_e$ | $\theta_w$ | $\theta_\pi$ | <b>D</b> | $\rho$ |
|--------------|-------------|----------|----------|-------|-------|------------|--------------|----------|--------|
| AT4G33250    | usa         | 3        | 1        | 4     | 0.733 | 1.060      | 0.911        | -0.507   | 0      |
| AT4G36060    | usa         | 1        | 0        | 2     | 0.533 | 0.353      | 0.533        | 1.303    |        |
| AT4G38160    | usa         | 0        | 0        | 1     | 0.000 | 0.000      | 0.000        |          |        |
| AT4G38630    | usa         | 2        | 0        | 2     | 0.533 | 0.707      | 1.067        | 1.641    |        |
| AT4G39680    | usa         | 1        | 1        | 2     | 0.100 | 0.282      | 0.100        | -1.164   |        |
| AT4G40080    | usa         | 0        | 0        | 1     | 0.000 | 0.000      | 0.000        |          |        |
| AT5G04190    | usa         | 3        | 0        | 3     | 0.394 | 0.823      | 0.788        | -0.110   | 0      |
| AT5G20280    | usa         | 0        | 0        | 1     | 0.000 | 0.000      | 0.000        |          |        |
| AT5G41920    | usa         | 0        | 0        | 1     | 0.000 | 0.000      | 0.000        |          |        |
| AT5G43670    | usa         | 10       | 2        | 5     | 0.683 | 3.014      | 4.275        | 1.561    | 0      |
| AT5G48100    | usa         | 9        | 0        | 10    | 0.918 | 2.469      | 4.004        | 2.085    | 2      |
| AT5G51670    | usa         | 0        | 0        | 1     | 0.000 | 0.000      | 0.000        |          |        |
| AT5G53020    | usa         | 0        | 0        | 1     | 0.000 | 0.000      | 0.000        |          |        |
| AT5G66280    | usa         | 1        | 0        | 2     | 0.455 | 0.274      | 0.455        | 1.142    |        |
